# Supplementary material
Source: PubMed Central journal article supplement (PMC7039551)
Supplement: supp_RA119.009451_152985_4_supp_458842_q45q0t.pdf [file supp_RA119.009451_152985_4_supp_458842_q45q0t.pdf]

## Supporting Information

**Table S1: Fly line used in this study**

| Line No.                         | Genotype                                                       | Origin                  |
|----------------------------------|----------------------------------------------------------------|-------------------------|
| BL-35514                         | w[*];P(4-10,27,30)9.1                                          | (Katsani et al., 2008)  |
| dElys <sup>KK</sup><br>(v103547) | P{KK100932}VIE-260B                                            | VDRC                    |
| dElys <sup>TRiP</sup>            | Y <sup>1</sup> V <sup>1</sup> ;p{pVALIUM10_dElys-1}/Cyo;attp40 | This Study (TRiP based) |
| EYFP-dELYS                       | W[*],p{pTVW-dElys}                                             | This Study              |
| BL-53269                         | y1 sc* v1; P{TRiP.HMC02426}attP2                               | (27)                    |
| BL-25374                         | y1 w*; P{Act5C-GAL4-w}E1/CyO                                   | BDSC                    |
| BL-5534                          | w*; P{GAL4-ey.H}3-8                                            | BDSC                    |
| BL-25754                         | P{UAS-Dcr-2.D}1, w1118; P{GawB}nubbin-AC-62                    | BDSC                    |
| BL-1561                          | w*; P{GAL4-arm.S}4a P{GAL4-arm.S}4b/TM3, Sb1 Ser1              | BDSC                    |
| BL-7062                          | w[*]; P{w[+mC]=matalpha4-GAL-VP16}V2H                          | BDSC                    |
| BL-6657                          | w[*]; P{w[+mC]=UAS-DIAP1.H}3                                   | BDSC                    |
|                                  | dElys <sup>KK</sup> ; UAS-DIAP1                                | This Study              |
| v105491<br>(Dorsal RNAi)         | P{KK107820}VIE-260B                                            | VDRC                    |
|                                  | dElys <sup>KK</sup> ; Dorsal <sup>RNAi</sup>                   | This Study              |
| v21937<br>(Nup160 RNAi)          | w[1118]; P{GD11413}v21937                                      | VDRC                    |
| v110194<br>(Nup133 RNAi)         | P{KK102392}VIE-260B                                            | VDRC                    |
| V22407<br>(Nup107 RNAi)          | w[1118]; P{GD12024}v22407                                      | VDRC                    |
| BL-32837<br>(Nup153 RNAi)        | y[1] sc[*] v[1]; P{y[+t7.7] [+t1.8]=TRiP.HMS00527}attP2        | BDSC                    |
| BL-47326<br>(fkh-GAL4)           | w[1118]; P{y[+t7.7] w[+mC]=GMR16E04-GAL4}attP2                 | BDSC                    |
| BL-6979<br>(C147-GAL4)           | w[1118]; P{w[+mW.hs]=GawB}C147                                 | BDSC                    |
|                                  | w[1118];C147-GAL4;fkh-GAL4                                     | This study              |

|         |                                                |            |
|---------|------------------------------------------------|------------|
| BL-4775 | w[1118]; P{w[+mC]=UAS-GFP.nls}14               | BDSC       |
|         | Nucleoporin RNAi; UAS-GFP-NLS                  | This study |
| BL-7096 | dl[4] pr[1] cn[1] wx[wxt] bw[1]/CyO            | BDSC       |
|         | UAS- <i>dElys</i> ; <i>dElys</i> <sup>KK</sup> | This study |

**Table S2: Primer used in this study**

| Primer Name             | Sequence                                 |
|-------------------------|------------------------------------------|
| <i>dElys</i> _1_F       | 5-ATTCCCGGGTATGGAGTGGCACGAAGTGGAGTTGG-3' |
| <i>dElys</i> _2111_R    | 5' -ATCGCGGCCGCCTAATGCTCCGACTTGGAGGTG-3' |
| <i>dElys</i> _1769_F    | 5' -ATCGAATTCCAGTCTAGTGGTCTTGGGG-3'      |
| Nup43_F                 | 5' -ATCGAATTCCAATCGAACCAATATGTCACC-3'    |
| Nup43_R                 | 5' -ATCCTCGAGTTAATTTTCCACGGAGACGATGC-3'  |
| AT-hook_F               | 5'-CAGGAATTCTTGCGACCGCGTCG-3'            |
| AT-hook_R               | 5'-CAGCTCGAGCTAGCCGGGTCTGGAG-3'          |
| AT-hook_mAT-1_F         | 5'-CGAACTCTGGCACCTGCTGCCGTCTCC-3'        |
| AT-hook_mAT-1_R         | 5'- GGAGACGGCAGCAGGTGCCAGAGTTTCG-3'      |
| AT-hook_mAT-2_F         | 5'-ACTCCCAAGGCTGCTGGGTTCGAGCAC-3'        |
| AT-hook_mAT-2_R         | 5'-GTGCTGCAACCCAGCAGCCTTGGGAGT-3'        |
| AT-hook_mAT-3_F         | 5'-CCGGCCACCGCCTCGGCAACGCGCCTC-3'        |
| AT-hook_mAT-3_R         | 5'-GAGGCGCGTTGCCGAGGCGGTGGCCGG-3'        |
| <i>dElys</i> _gateway_F | 5'-CACCATGGAGTGGCACGAAGTGGAG-3'          |
| <i>dElys</i> _gateway_R | 5'-CTAATGCTCCGACTTGGAGG-3'               |
| <i>dElys</i> _NLS_F     | 5'-CACCGACCAGAGGCAGC-3'                  |
| <i>dElys</i> _NLS_R     | 5'-AGTTCGCAGAGGAATGG-3'                  |
| <i>dElys</i> _NES_F     | 5'-CACCGCGGTGCCGGACG-3'                  |
| <i>dElys</i> _NES_R     | 5'-TTCCAACCTCCGGCAC-3'                   |

|              |                                |
|--------------|--------------------------------|
| dElys_RT_F   | 5'-GATGAGGAGGAGCAAGATGTG-3'    |
| dElys_RT_R   | 5'-TTGGATGCGGGCGATAAA-3'       |
| RpL49_F      | 5'-CGTTTACTGCGGCGAGAT-3'       |
| RpL49_R      | 5'-GTGTATTCCGACCACGTTACA-3'    |
| Nup153_RT_F  | 5'-GCACCAAAGGTCAACAACCTTC-3'   |
| Nup153_RT_R  | 5'-GGGAGTCGCAACAGCTATATT-3'    |
| dElys_TRiP_F | 5'-CACCTGGAGCCCTACCAAAAGAC-3'  |
| dElys_TRiP_R | 5'-CGCCTGGAGGAAATTTGG-3'       |
| CG15643_RT_F | 5'- ACTGCGTTCACCTTCTACTG-3'    |
| CG15643_RT_R | 5'-CCTAAAGCGATCCCTGACTTAG-3'   |
| CG7051_RT_F  | 5'-CCTTGGTCTCCCAAACCTCTTC-3'   |
| CG7051_RT_R  | 5'-CCGGTTCACCGTCACAATAA-3'     |
| Reaper_RT_F  | 5'-CGGAAGAAAGTCCGGCAAATA-3'    |
| Reaper_RT_R  | 5'-GTTGTGGCTCTGTGTCCTT-3'      |
| Hid_RT_F     | 5'-CGATTGAAATTTGGCCAGAAGAG -3' |
| Hid_RT_R     | 5'-GCCCGGGAAATTCTAGCATATAG-3'  |
| DIAP-1_RT_F  | 5'-GCCGGCGACAAAGTTAAATG-3'     |
| DIAP-1_RT_R  | 5'-GCCGCAGATATCGTAGCTTATT-3'   |
| Snail_RT_F   | 5'-CTCATCGGGATACTCCTACACT-3'   |
| Snail_RT_R   | 5'-GTGGGTCTTCTTCTCCTGATTAC-3'  |
| Twist_RT_F   | 5'-CCAGCAACAGATCTATGTGGATTA-3' |
| Twist_RT_R   | 5'-TGCTGCTGGTTGTTGTAGAG-3'     |
| Rho_RT_F     | 5'-GAACTAATCGCCTCTCGCTATG-3'   |
| Rho_RT_R     | 5'-ATCCTACAATTCGGAGCACATT-3'   |

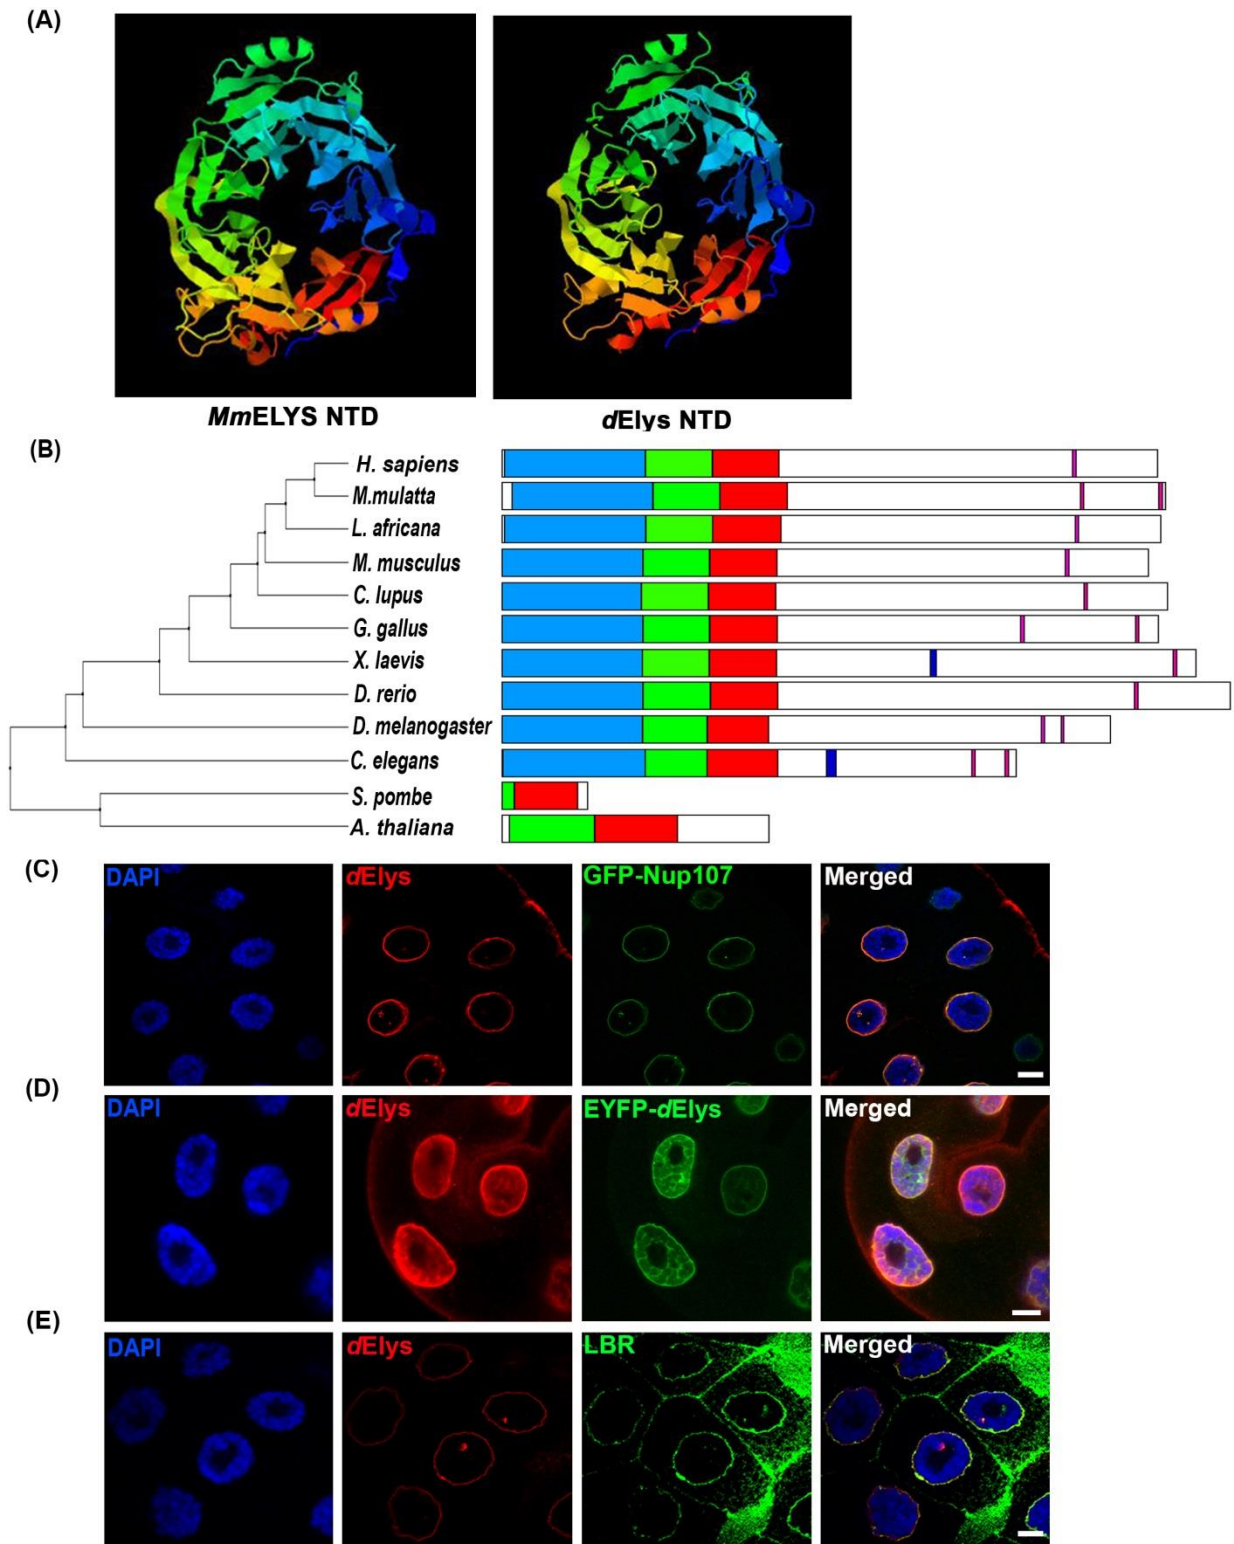

**Figure S1: *dElys* is structurally conserved and show nuclear rim co-localization with Nup107 and LBR**

(A) Modeling of N-terminal domain of *dElys* modeled using Phyre2 software and compared with mouse ELYS N-terminal domain.

(B) Phylogenetic analysis of ELYS orthologues from yeast, invertebrates, vertebrates, and plants. Domain structure of ELYS represented as  $\beta$ -sheet containing N-terminal domain (blue),  $\alpha$ -helical central domain (green), conserved ELYS domain (red), coiled-coil domain (dark blue) and AT-hook like DNA binding motifs (purple).

(C) Anti-*dElys* serum (red) used for staining on the third instar larval salivary gland from GFP-Nup107 (green) expressing larva. DNA is stained with DAPI. (Scale bar: 10  $\mu$ m)

(D) EYFP tagged *dElys* (green) expressed in third instar larval *Drosophila* salivary gland nuclei located on the nuclear periphery. DNA is stained with DAPI. (Scale bar: 5  $\mu$ m)

(E) Localization of *dElys* (red) and Lamin B receptor (LBR) (green) at the nuclear rim in third instar larval *Drosophila* salivary glands. DNA is stained with DAPI. (Scale bar: 5  $\mu$ m)

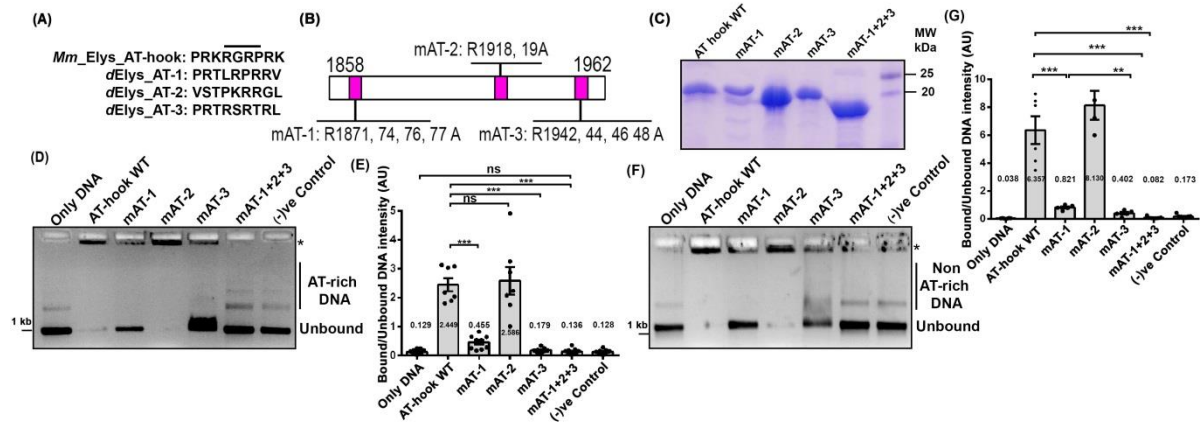

**Figure S2: dElys AT-hook like motifs are functional**

(A) Three predicted AT-hook like DNA binding motifs of CG14215 are compared with the canonical mouse AT-hook motif. Core -RGRP- signature residues of AT-hook are marked.

(B) Graphical representation of the position of each AT-hook like motif of dElys in fragment cloned for protein purification. Conserved arginine residues were mutated to alanine, and the position of each arginine residue is indicated.

(C) The SDS-PAGE analysis of purified wild-type and mutant AT-hook like proteins used for the DNA binding experiment. Molecular weight markers are indicated next to the gel.

(D) DNA binding ability of predicted AT-hook like motifs is tested in the EMSA experiment. AT-rich DNA binding by purified AT-hook like fragment (AA. 1858-1962) and mutated AT-hook proteins where arginines mutated to alanines are shown. The type of protein used is indicated above each lane. An asterisk indicates bound DNA with decreased mobility.

(F) Non-AT rich DNA binding ability of predicted AT-hook like motifs is tested in the EMSA experiment. A variant of protein used in the reaction is indicated above each lane. An asterisk indicates bound DNA with decreased mobility.

(E, G) Quantification of AT-rich DNA (E) and Non-ATrich DNA (G) binding ability of each AT-hook like fragment used. Quantification is derived from at least three independent experiments. Quantification values are mentioned with each bar. \*\*\* represents  $p < 0.0001$ , ns is non-significant. Error bars represent standard error of the mean (SEM). Statistical analysis is derived from one-way ANOVA followed by post-hoc Tukey's multiple comparison tests.

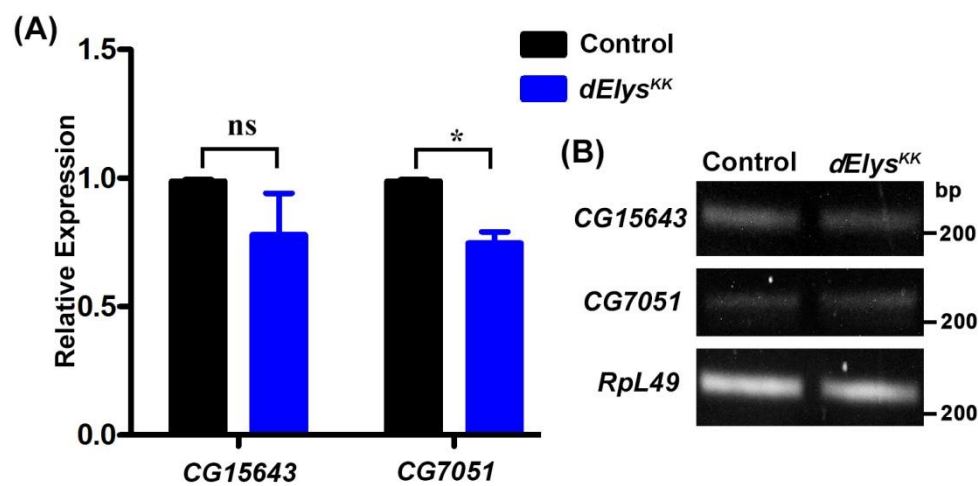

**Figure S3: Expression analysis of predicted off-targets of the *dElys<sup>KK</sup>* RNAi line**

(A) Graphical representation of quantitative PCR showing the expression level of predicted off-targets (*CG15643* and *CG7051*) of the *dElys<sup>KK</sup>* RNAi line from VDRC. Data are represented from at least five independent experiments. Statistical significance derived from the student's t-test. The error bars represent the standard deviation. \* represents  $p < 0.05$ , ns is non-significant.

(B) Semi-quantitative PCR analysis of *dElys<sup>KK</sup>* RNAi line off-targets. *RpL49* was used as an internal control gene. Data are derived from at least three independent experiments.

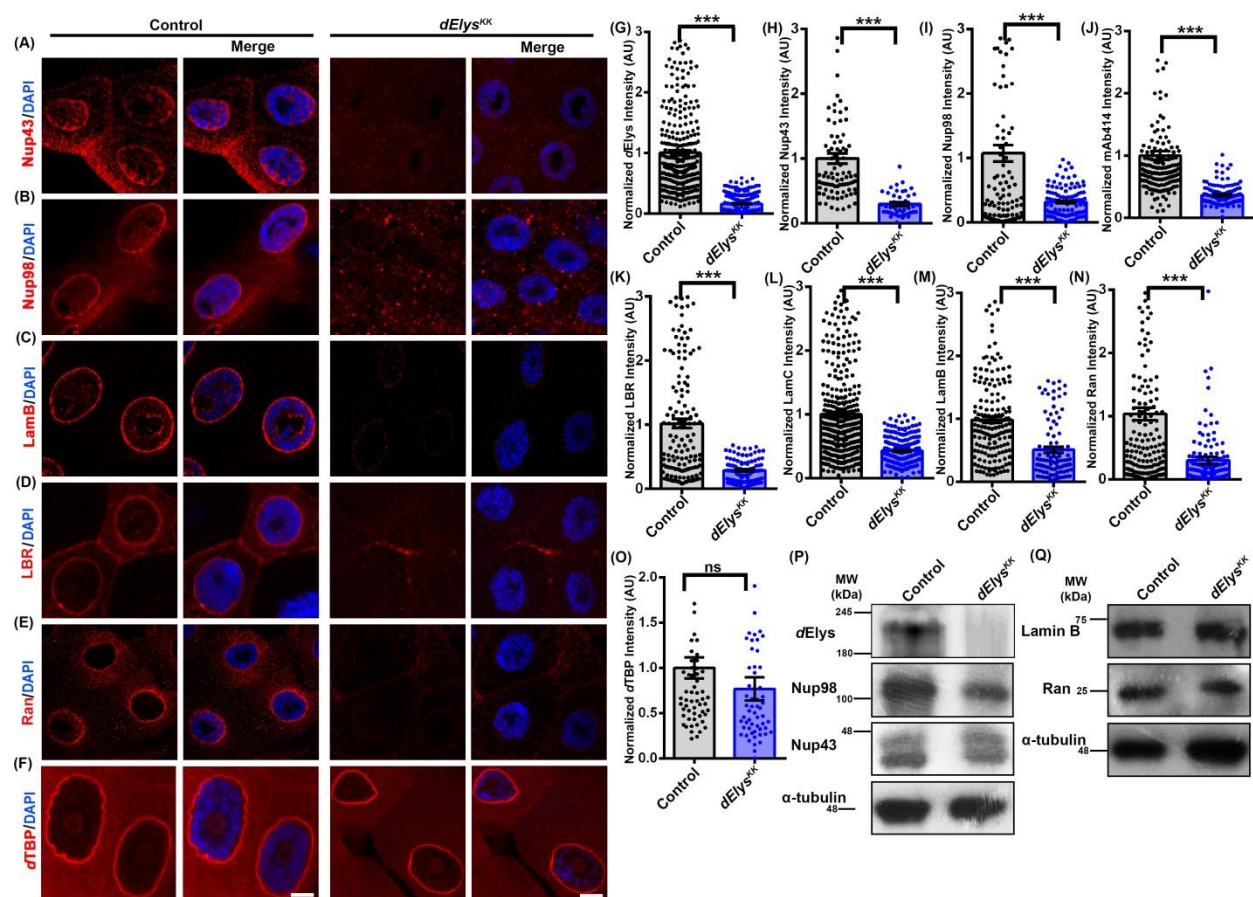

**Figure S4: *dElys* depletion induces defects in nuclear pore complex and nuclear lamina but not the nuclear membrane**

(A-E) Localization of Nup43, Nup98, Lamin B, LBR, and Ran on the nuclear rim assessed in control (first and second vertical columns) and *dElys* depleted (ubiquitous *Act5C*-GAL4 driven, third and fourth vertical columns) third instar larval salivary gland nuclei. DNA is stained with DAPI (Scale bar: 5 μm). Control is wild-type flies crossed with the *Act5C*-GAL4 driver.

(F) Staining of nuclear membrane-associated protein dTBP in third instar larval control and *dElys* depleted (ubiquitous *Act5C*-GAL4 driven) salivary gland nuclei (Scale bar: 5 μm).

(G-O) Quantitation of nuclear rim localization of dElys, Nup43, Nup98, mAb414, LBR, Lamin C, Lamin B, Ran, dTBP in control and *dElys* RNAi. The intensities of

each molecule were normalized against the intensity of DAPI. Data are represented from at least three independent experiments. At least 45 nuclei were analyzed from 7-8 pairs of salivary glands. Statistical significance derived from the student's t-test. Error bars represent SEM. ns is non-significant.

(P, Q) Western blot analysis to detect levels of indicated molecules in control and *dElys* knockdown (ubiquitous *Act5C*-GAL4 driven) lysates prepared from third instar larva head complex. Nup98, Nup43, Lamin B and Ran were detected in stripes separated from blots used in Fig. 3.  $\alpha$ -tubulin was used as a loading control. Control is wild-type flies crossed with the *Act5C*-GAL4 driver. Each western is performed at least three times.

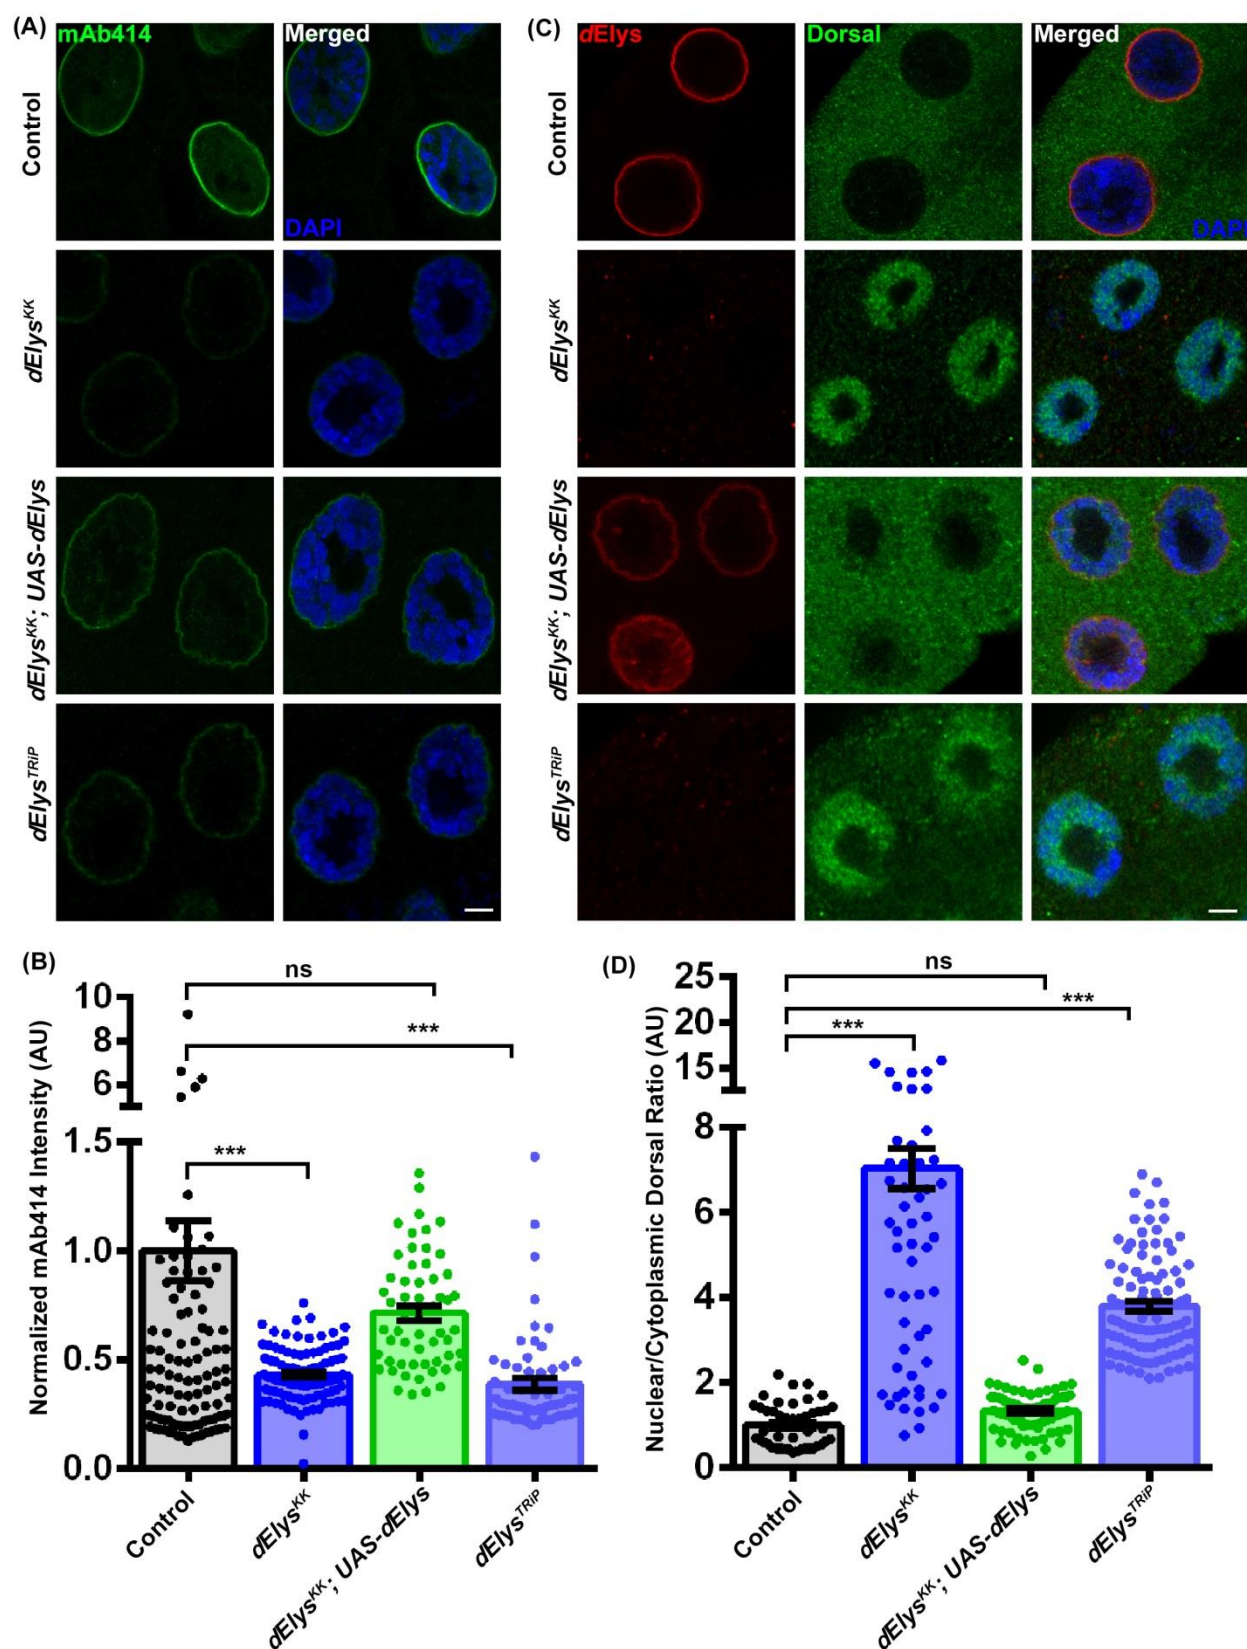

Figure S5: *dElys* depletion phenotype is consistent in both RNAi lines can be partially rescued by providing an extra copy of *dElys*

(A) Third instar larval salivary glands stained with mAb414 antibodies (FG-repeat nucleoporins, green) in control, *dElys*<sup>KK</sup>, and *dElys*<sup>KK</sup>; *UAS-dElys* and *dElys*<sup>TRiP</sup> organisms. DNA is stained with DAPI. RNAi and *dElys* transgene were driven with ubiquitous *Act5C*-GAL4 and salivary gland specific *fkh*-GAL4. Control is wild type flies crossed with *Act5C*-GAL4; *fkh*-GAL4. (Scale Bar: 5  $\mu$ m)

(B) The quantification of nuclear rim intensities of mAb414 from control, *dElys*<sup>KK</sup>, and *dElys*<sup>KK</sup>; *UAS-dElys* and *dElys*<sup>TRiP</sup> salivary glands. Data are represented from at least three independent experiments. At least 45 nuclei were analyzed from 7-8 pairs of salivary glands. Statistical significance derived from one-way ANOVA followed by Tukey's post-hoc test. The error bar is SEM. \*\*\* represents  $p < 0.0001$  and ns is non-significant.

(C) Detection of Dorsal (Green), and *dElys* (Red) localization in control, *dElys*<sup>KK</sup>, and *dElys*<sup>KK</sup>; *UAS-dElys* and *dElys*<sup>TRiP</sup> organisms. DNA is stained with DAPI. RNAi and *dElys* transgene were driven with ubiquitous *Act5C*-GAL4 and salivary gland specific *fkh*-GAL4. Control is wild type flies crossed with *Act5C*-GAL4; *fkh*-GAL4. (Scale Bar: 5  $\mu$ m)

(D) The quantification of nuclear Dorsal intensities from control, *dElys*<sup>KK</sup>, and *dElys*<sup>KK</sup>; *UAS-dElys* and *dElys*<sup>TRiP</sup> salivary glands. Data are represented from at least three independent experiments. At least 45 nuclei were analyzed from 7-8 pairs of salivary glands. Statistical significance derived from one way ANOVA followed by Tukey's post-hoc test. The error bar is SEM. \*\*\* represents  $p < 0.0001$  and ns is non-significant.

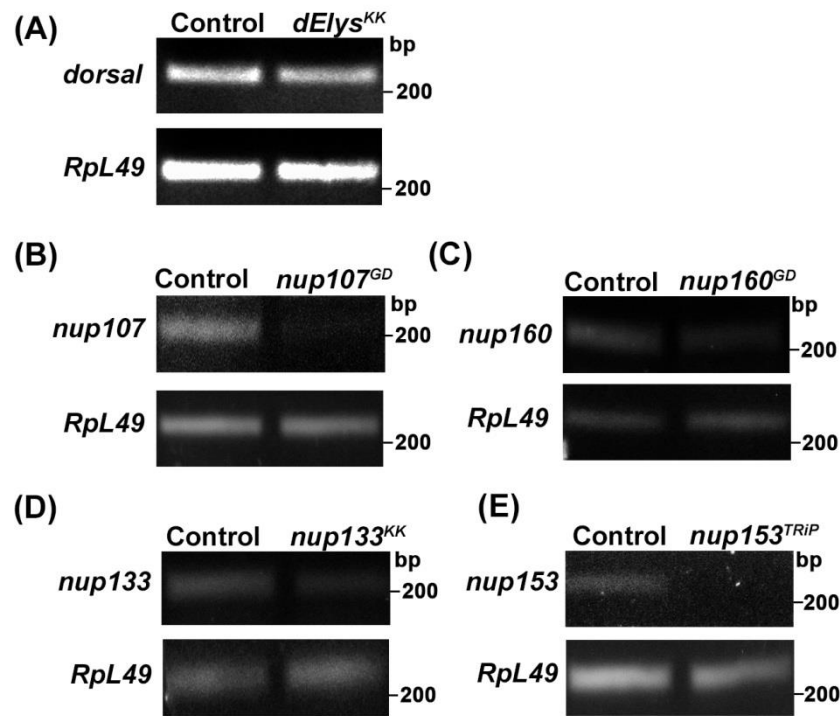

**Figure S6: Expression analysis of other nucleoporins knockdown by RNAi lines**

(A) Semi-quantitative PCR analysis for expression of *dorsal* in control and *dElys* depleted cDNA. *RpL49* was used as an internal control gene. Data are derived from at least three independent experiments.

(B-E) Semi-quantitative PCR analysis of nucleoporins expression in their respective RNAi knockdown. *RpL49* was used as an internal control gene. Data are derived from at least three independent experiments.

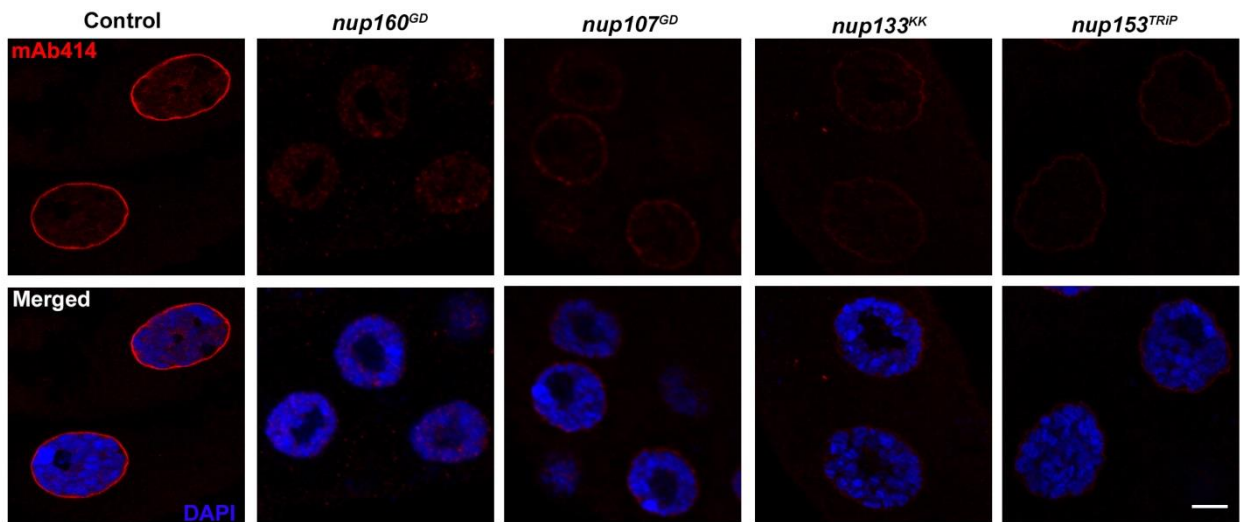

**Figure S7: Depletion of other essential nucleoporins perturbs the NPC structure**

mAb414 staining of third instar larval salivary gland nuclei from essential nucleoporin (mentioned above panels) depleted organisms. DNA is stained with DAPI (Scale bar: 5  $\mu$ m).

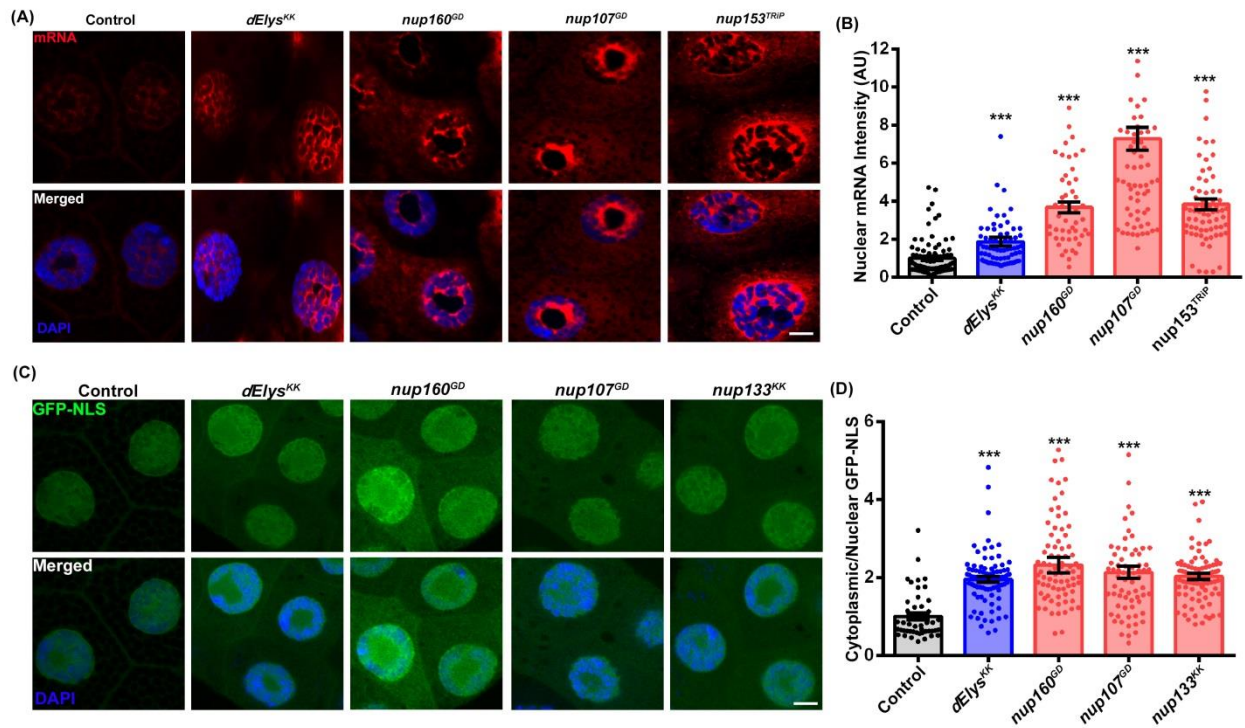

**Figure S8: Depletion of other essential nucleoporins affects NPCs functions similar to *dElys* depletion**

(A) mRNA-FISH based assessment of mRNA export in salivary gland nuclei of third instar larva from *dElys* and knockdown other indicated nucleoporins. DNA is stained with DAPI (Scale bar: 5  $\mu$ m).

(B) Quantification of the nuclear intensity of mRNA. Data are represented from at least three independent experiments. Statistical significance derived from one-way ANOVA followed by Tukey's post-hoc test. The error bar is SEM. \*\*\* represents  $p < 0.0001$ , ns is non-significant. At least 45 nuclei were analyzed from 7-8 pairs of salivary glands.

(C) Nuclear import defect assessment in third instar larval salivary glands by GFP-NLS localization in *dElys* and other indicated nucleoporin depletion. DNA is stained with DAPI (Scale bar: 5  $\mu$ m).

(D) Quantification of the cytoplasmic/nuclear intensity ratio of GFP-NLS showing a marked increase in GFP-NLS in the cytoplasm. Data are represented from at least three independent experiments. Statistical significance derived from one-way ANOVA followed by Tukey's post-hoc test. The error bar is SEM. \*\*\* represents  $p < 0.0001$ . At least 45 nuclei were analyzed from 7-8 pairs of salivary glands.

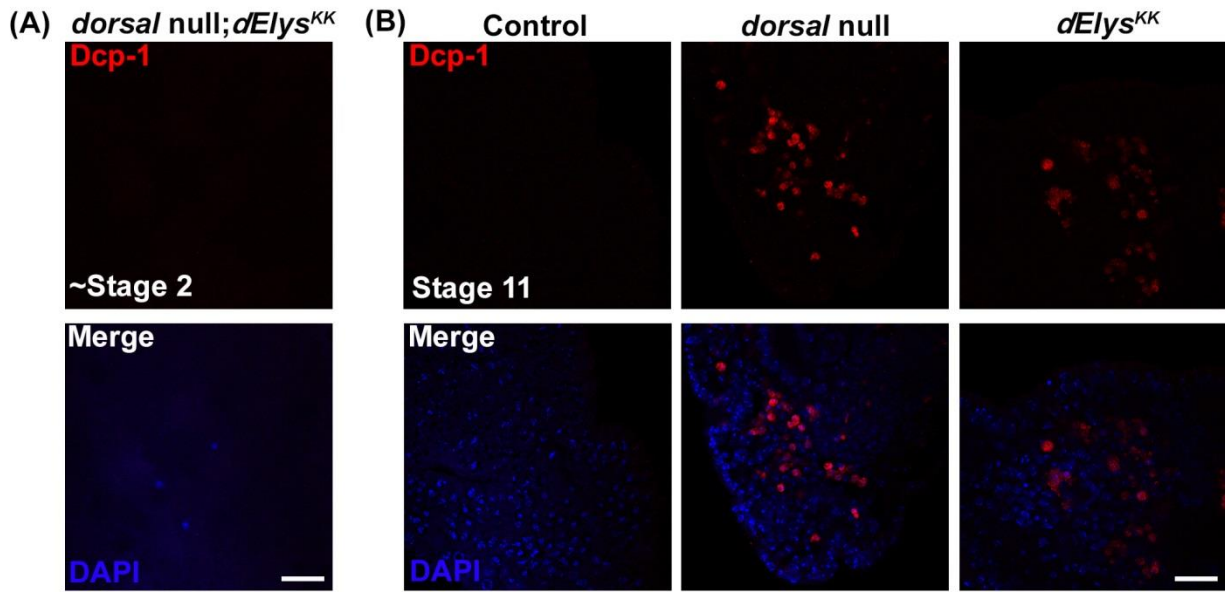

**Figure S9: Loss of *dorsal* and *dElys* induces apoptosis in embryos**

(A) Early embryonic growth defects in organisms from the combined loss of *dorsal* and *dElys* (*dorsal null; dElys<sup>KK</sup>*) analyzed for induction of apoptosis using the Dcp-1 (red) antibody. DNA is stained with DAPI (Scale bar: 20  $\mu$ m).

(B) The anterior region of stage 11 embryos from in control, *dorsal null*, *dElys* depletion (*mat- $\alpha$ -tub-GAL4* driven) stained with Dcp-1 (red) for assessment of apoptotic response (Scale bar: 20  $\mu$ m).

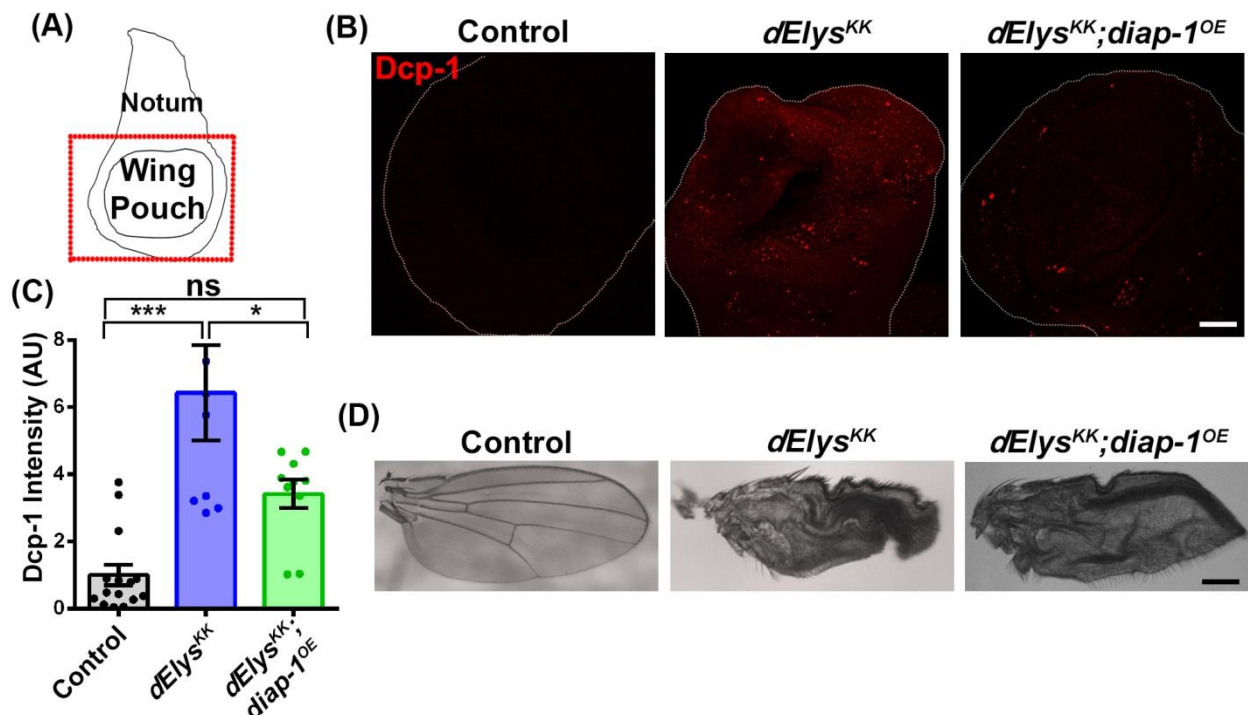

**Figure S10: *diap-1* over-expression can partially rescue *dElys* depletion induced apoptotic phenotype in wings**

(A) Schematic of wing imaginal disc from third instar larva highlighting the wing pouch area imaged in B

(B) Wing imaginal discs from control, *dElys* depletion, and *dElys<sup>KK</sup>; diap-1<sup>OE</sup>* third instar larva driven with *nubbin*-GAL4; *Ubx*-GAL4 stained for Dcp-1. The shape of the wing imaginal disc is outlined for comparisons (Scale bar: 20  $\mu$ m).

(C) Quantitation of Dcp-1 intensity in wing pouch area in control, *dElys<sup>KK</sup>* and *dElys<sup>KK</sup>; diap-1<sup>OE</sup>*. Data is derived from two independent experiments. Statistical significance derived from one way ANOVA followed by Tukey's post-hoc test. The error bar is SEM. \*\*\* represents  $p < 0.0001$ , \* represents  $p < 0.05$  and ns is non-significant.

(D) Adult wing from control, *dElys* depletion, and *dElys<sup>KK</sup>; diap-1<sup>OE</sup>* organisms as indicated. (Scale bar: 200  $\mu$ m).
